# Supplementary material for: BCL11B Is Up-Regulated by EWS/FLI and Contributes to the Transformed Phenotype in Ewing Sarcoma
Source: PLoS One. 2013 Mar 19;8(3):e59369. doi: 10.1371/journal.pone.0059369 (PMC3601955; doi:10.1371/journal.pone.0059369)
Supplement: Table S2 — BCL11B RNAseq Data with FDR 10% and 2 fold change. (XLSX) [file pone.0059369.s003.xlsx]

## Sheet: BCL11BdiffExprFDR10.0LgRto1.000
#DisplayName	Name	Chr	Strand	Start	Stop	TotalRegionBPs	NegBinomPVal	BH_FDR	Log2((sumT+1)/(sumC+1))	AltSpliceChiSqrPVal	AltSpliceMaxLog2Ratio	tFPKM	cFPKM	#T1	#T2	#T3	#T4	#C1	#C2	varCorrT1	varCorrT2	varCorrT3	varCorrT4	varCorrC1	varCorrC2	GenomeVersion=null, QueriedTreatObs=22414051, QueriedCtrlObs=11650442
SH2D3C	SH2D3C	chr9	-	130500596	130541048	4227	25.8833	10.5694	3.48236	0	0	0.654394	0.020306	4	23	10	25	1	0	-11.1393	-9.54807	-10.1472	-9.38762	-12.1515	-13.5171
CMTM7	CMTM7	chr3	+	32433162	32496333	1351	44.2103	23.5398	3.35375	0	0	1.8163	0.0635334	20	11	11	13	1	0	-9.60887	-10.3091	-10.0511	-10.081	-12.1515	-13.5171
EBI3	EBI3	chr19	+	4229539	4237517	1130	75.7771	49.9634	3.21043	0	0	4.73786	0.379795	30	42	25	23	4	1	-9.15984	-8.86875	-9.16734	-9.47949	-11.2256	-12.0254
GPX3	GPX3	chr5	+	150399998	150408553	1760	68.7837	43.9179	2.99107	0	0	2.99122	0.292615	30	44	19	25	5	1	-9.15984	-8.81432	-9.47351	-9.38762	-11.044	-12.0254
TINAGL1	TINAGL1	chr1	+	32013117	32053285	2458	32.2212	14.8433	3.02009	0	0	0.780488	0.0349201	9	18	11	5	1	0	-10.4219	-9.81018	-10.0511	-10.9711	-12.1515	-13.5171
C6orf218	C6orf218	chr6	-	10428017	10435055	3018	96.2512	67.7339	2.85183	0	0	3.78443	0.455049	76	84	39	57	9	7	-8.05241	-8.03193	-8.65048	-8.4309	-10.5235	-10.5494
IL2RB	IL2RB	chr22	-	37521879	37545962	4043	110.968	81.0676	2.83449	0	0	2.43876	0.297223	57	56	44	64	8	6	-8.40572	-8.52801	-8.50616	-8.28997	-10.6326	-10.691
PLVAP	PLVAP	chr19	-	17462263	17488137	2276	26.6111	11.0043	2.82505	0	0	1.96023	0.188563	15	43	11	31	2	3	-9.9132	-8.84125	-10.0511	-9.14622	-11.7318	-11.2761
KLHDC7A	KLHDC7A	chr1	+	18807423	18812539	5116	26.3584	10.8415	2.75027	0	0	0.313944	0.0167775	8	14	4	10	1	0	-10.5332	-10.0695	-10.9937	-10.3406	-12.1515	-13.5171
LRRC32	LRRC32	chr11	-	76368568	76381791	4445	42.3085	22.0988	2.66092	0	0	0.782893	0.0965508	14	30	17	17	5	0	-9.98433	-9.25429	-9.59462	-9.80422	-11.044	-13.5171
GREB1	GREB1	chr2	+	11674241	11782912	11412	44.7179	23.9158	2.58765	0	0	0.336214	0.0451281	20	27	23	16	5	1	-9.60887	-9.37195	-9.26144	-9.86772	-11.044	-12.0254
TGM2	TGM2	chr20	-	36756865	36793700	6708	43.7303	23.156	2.49965	0	2.47409	3.33215	0.53742	116	184	56	145	23	19	-7.51806	-7.02732	-8.21274	-7.25663	-9.57387	-9.53861
GMPR	GMPR	chr6	+	16238810	16295778	1513	103.66	74.7288	2.39222	0	0	8.10911	1.36154	75	88	41	71	11	13	-8.06887	-7.97392	-8.59085	-8.16245	-10.3322	-9.94109
CATSPER1	CATSPER1	chr11	-	65784223	65793988	2618	60.6898	37.2608	2.25908	0	0	2.60736	0.491789	38	56	27	32	11	4	-8.88795	-8.52801	-9.07967	-9.11007	-10.3322	-11.0437
APOBEC3A	APOBEC3A	chr22	+	39353526	39388783	1444	44.5651	23.8293	2.28288	0	0	3.24416	0.594416	27	30	28	20	8	2	-9.27869	-9.25429	-9.03798	-9.63128	-10.6326	-11.5781
ICAM1	ICAM1	chr19	+	10381516	10397291	3246	37.2246	18.3928	2.29335	0	2.37718	24.4378	4.91838	401	688	219	470	140	46	-5.86785	-5.23778	-6.45069	-5.67832	-7.41427	-8.52435
SAA2	SAA2	chr11	-	18260589	18270182	1468	37.394	18.506	2.21527	0	0	2.61368	0.467758	14	29	14	29	6	2	-9.98433	-9.29232	-9.80174	-9.22172	-10.889	-11.5781
MSI1	MSI1	chr12	-	120779132	120806958	2950	36.6685	17.9698	2.23913	0	0	1.20989	0.203673	18	24	17	21	4	3	-9.72175	-9.50168	-9.59462	-9.57861	-11.2256	-11.2761
CARD10	CARD10	chr22	-	37875382	37915378	2804	32.0171	14.6845	2.17357	0	0	1.09787	0.183667	25	20	10	14	3	3	-9.36456	-9.6986	-10.1472	-10.0056	-11.4463	-11.2761
SUOX	SUOX	chr12	+	56391042	56399307	3507	104.934	75.7803	2.14426	0	0	4.09638	0.881098	90	102	59	71	24	12	-7.8408	-7.78838	-8.14842	-8.16245	-9.52762	-10.0232
HFE2	HFE2	chr1	+	145413190	145417545	2215	39.1529	19.719	2.13905	0	0	1.77251	0.310009	19	26	19	24	2	6	-9.66403	-9.41373	-9.47351	-9.43271	-11.7318	-10.691
AQP1	AQP1	chr7	+	30893009	30965131	3177	33.627	15.7338	2.10493	0	0	1.06727	0.18912	15	30	11	20	3	4	-9.9132	-9.25429	-10.0511	-9.63128	-11.4463	-11.0437
NUDT16	NUDT16	chr3	+	131100637	131104929	4292	32.5056	15.0045	2.09949	0	0	0.810801	0.159988	24	17	23	14	5	3	-9.40977	-9.87002	-9.26144	-10.0056	-11.044	-11.2761
CA14	CA14	chr1	+	150230217	150237476	1355	60.2778	36.9096	2.02351	0	2.98054	5.72914	1.26692	35	56	34	49	11	9	-8.98334	-8.52801	-8.81255	-8.61265	-10.3322	-10.31
GPER	GPER	chr7	+	1121843	1133451	3149	49.159	27.5517	2.02365	0	0	4.50541	1.06304	60	105	52	101	28	11	-8.34337	-7.75171	-8.30358	-7.72129	-9.35796	-10.1113
ZBTB46	ZBTB46	chr20	-	62375877	62462597	4524	40.1887	20.5261	2.02361	0	0	1.05521	0.227675	28	27	26	26	7	5	-9.23783	-9.37195	-9.12276	-9.34407	-10.7534	-10.8532
SDC1	SDC1	chr2	-	20400557	20425194	3559	31.4039	14.2045	2.03468	0	0	0.965256	0.192939	17	25	13	22	5	3	-9.78231	-9.45693	-9.87932	-9.52807	-11.044	-11.2761
ACP5	ACP5	chr19	-	11685476	11689801	2134	28.9608	12.5823	2.01149	0	0	1.79798	0.361998	23	34	10	19	5	4	-9.45667	-9.11258	-10.1472	-9.68628	-11.044	-11.0437
TP53I3	TP53I3	chr2	-	24300304	24307728	1595	61.2042	37.5234	1.88222	0	2.47598	7.46845	1.8835	62	86	39	80	21	14	-8.30336	-8.00261	-8.65048	-8.01445	-9.67186	-9.86418
HAGHL	HAGHL	chr16	+	776957	779715	1961	38.1965	19.0653	1.88949	0	0	2.54812	0.612785	21	35	29	27	8	6	-9.55606	-9.07947	-8.99758	-9.30197	-10.6326	-10.691
KIAA1928	KIAA1928	chr1	-	177975276	178007142	2427	28.812	12.4934	1.85676	0	0	1.41547	0.318295	21	24	14	18	4	5	-9.55606	-9.50168	-9.80174	-9.74384	-11.2256	-10.8532
PIPOX	PIPOX	chr17	+	27369917	27384236	2412	129.698	95.5377	1.77136	0	2.35042	15.593	4.37709	251	244	152	196	68	55	-6.50355	-6.65337	-6.93738	-6.86108	-8.3217	-8.30784
C8orf31	C8orf31	chr8	+	144120678	144135720	2072	71.5278	46.2139	1.75769	0	2.08892	6.0075	1.69845	68	83	63	65	25	16	-8.19004	-8.04683	-8.06718	-8.271	-9.48301	-9.72351
FAM109A	FAM109A	chr12	-	111798484	111806925	3206	154.828	118.908	1.70309	0	1.80499	11.1746	3.31983	187	245	178	193	70	54	-6.89576	-6.64791	-6.72809	-6.88149	-8.28628	-8.33024
NFAM1	NFAM1	chr22	-	42776414	42828401	5603	63.8054	39.7878	1.7318	0	0	1.97474	0.566812	62	72	60	54	22	15	-8.30336	-8.2226	-8.12765	-8.49618	-9.6219	-9.79183
LOC401093	LOC401093	chr3	-	151980412	151987415	5615	36.4932	17.8558	1.66271	0	0	1.01704	0.290443	28	27	32	41	9	10	-9.23783	-9.37195	-8.88345	-8.82345	-10.5235	-10.2065
ADORA1	ADORA1	chr1	+	203096835	203136533	1523	29.1404	12.7134	1.7164	0	0	3.33952	0.901732	25	42	14	33	10	6	-9.36456	-8.86875	-9.80174	-9.0749	-10.4239	-10.691
C22orf36	C22orf36	chr22	-	24981590	24989035	2030	26.4431	10.8664	1.68921	0	0	1.86811	0.507391	24	32	12	17	8	4	-9.40977	-9.18148	-9.96218	-9.80422	-10.6326	-11.0437
NCEH1	NCEH1	chr3	-	172348435	172429008	4314	117.018	85.8681	1.61967	0	1.62747	6.22581	1.94986	150	176	119	157	56	42	-7.18537	-7.08567	-7.25806	-7.15296	-8.55653	-8.63319
TGFBR1	TGFBR1	chr9	+	101867411	101916471	6190	93.6931	65.3688	1.57134	0	1.6847	6.86161	2.24637	236	291	156	269	102	60	-6.58615	-6.41716	-6.90308	-6.4384	-7.81839	-8.20116
RIMBP3C	RIMBP3C	chr22	-	21899965	21905750	5785	74.0815	48.4746	1.63829	0	0	2.60671	0.81605	86	108	64	80	38	17	-7.89797	-7.71599	-8.04761	-8.01445	-9.01235	-9.65877
FAM114A1	FAM114A1	chr4	+	38869436	38945424	2257	48.9667	27.4391	1.60213	0	1.8602	4.03254	1.25499	54	62	35	53	21	12	-8.47112	-8.40516	-8.7785	-8.51867	-9.67186	-10.0232
MPZ	MPZ	chr1	-	161274526	161279762	1953	48.7479	27.2986	1.56729	0	1.51953	4.7973	1.53824	60	54	50	46	20	15	-8.34337	-8.57162	-8.35142	-8.6878	-9.72391	-9.79183
ANKRD24	ANKRD24	chr19	+	4183350	4224811	4122	33.837	15.8574	1.60401	0	2.14129	14.9799	4.83101	280	513	215	376	158	74	-6.35637	-5.64427	-6.47548	-5.98434	-7.25759	-7.94079
S1PR1	S1PR1	chr1	+	101702304	101707076	3050	126.106	92.6151	1.502	0	0	10.9562	3.65848	196	227	142	184	63	67	-6.83354	-6.7496	-7.02702	-6.94458	-8.41457	-8.06472
UPP1	UPP1	chr7	+	48128354	48148329	2131	112.844	82.3641	1.51274	0	2.09871	13.8178	4.67232	187	194	118	161	68	48	-6.89576	-6.95764	-7.26903	-7.12006	-8.3217	-8.4731
FUCA2	FUCA2	chr6	-	143816245	143832863	1213	92.5586	64.5594	1.47847	0	0	19.8247	6.93462	133	165	116	125	60	38	-7.34175	-7.17012	-7.29124	-7.44873	-8.47357	-8.75181
APOBEC3B	APOBEC3B	chr22	+	39378404	39388783	1117	82.8016	56.0452	1.51836	0	0	22.2875	7.6843	162	131	137	128	62	38	-7.08471	-7.46926	-7.07409	-7.41816	-8.43395	-8.75181
PGF	PGF	chr14	-	75408539	75422291	2106	47.4314	26.1344	1.51292	0	1.67748	79.1035	27.7961	1062	901	1017	754	419	263	-4.51262	-4.86115	-4.3258	-5.02246	-5.95472	-6.28408
AK125437	AK125437	chr1	+	11782186	11785914	3728	44.6064	23.8376	1.50987	0	0	5.45718	1.86495	131	154	77	94	54	27	-7.36137	-7.26002	-7.81595	-7.81219	-8.60004	-9.14761
RPS6KL1	RPS6KL1	chr14	-	75372346	75389958	4292	39.225	19.7223	1.52473	0	0	1.8399	0.619954	44	62	30	41	24	7	-8.71582	-8.40516	-8.95841	-8.82345	-9.52762	-10.5494
TBXA2R	TBXA2R	chr19	-	3594503	3606658	2428	27.2779	11.3875	1.4576	0	1.57795	3.85878	1.30801	38	82	37	53	21	16	-8.88795	-8.0619	-8.71293	-8.51867	-9.67186	-9.72351
CHPF	CHPF	chr2	-	220403669	220408487	3179	80.8205	54.442	1.35211	0	1.47142	21.4022	8.28906	350	506	307	362	201	106	-6.05373	-5.6632	-5.99286	-6.03612	-6.94224	-7.48469
FZD5	FZD5	chr2	-	208627311	208634143	6562	76.2742	50.1305	1.36534	0	0	3.39269	1.29496	130	161	99	109	66	33	-7.37128	-7.20214	-7.49592	-7.62431	-8.35808	-8.91697
ADCY6	ADCY6	chr12	-	49159975	49182820	5519	74.4312	48.7222	1.42889	0	1.41444	3.37906	1.19753	109	125	71	113	44	33	-7.59776	-7.52948	-7.91799	-7.57827	-8.84216	-8.91697
APOLD1	APOLD1	chr12	+	12878850	12974982	5139	69.994	44.9545	1.43918	0	1.50107	10.7218	3.80815	310	413	204	308	132	96	-6.21869	-5.94195	-6.54596	-6.25564	-7.49004	-7.61164
CBLN2	CBLN2	chr18	-	70203914	70211723	2918	53.6971	31.298	1.35924	0	1.2943	4.80091	1.82374	72	90	76	76	38	24	-8.11947	-7.94581	-7.83244	-8.07823	-9.01235	-9.28054
RIMBP3	RIMBP3	chr22	-	20456002	20461786	5784	45.1925	24.289	1.42293	0	0	2.89256	1.05363	98	130	65	82	49	22	-7.73317	-7.47911	-8.02831	-7.98364	-8.71554	-9.37754
TFPI2	TFPI2	chr7	-	93515744	93520065	1144	44.8725	24.0369	1.41014	0	1.81828	9.08677	3.30129	64	67	49	53	28	16	-8.26452	-8.31077	-8.37599	-8.51867	-9.35796	-9.72351
EFCAB2	EFCAB2	chr1	+	245133170	245288530	4946	43.2166	22.8284	1.36143	0	1.55525	1.97547	0.71152	59	67	44	49	19	22	-8.36383	-8.31077	-8.50616	-8.61265	-9.77826	-9.37754
C1orf187	C1orf187	chr1	+	11751780	11780336	1773	35.5015	17.1203	1.35626	0	1.36435	5.91342	2.27534	58	82	41	54	36	11	-8.38461	-8.0619	-8.59085	-8.49618	-9.07443	-10.1113
GPR128	GPR128	chr3	+	100328432	100414321	3856	29.6329	13.0443	1.37923	0	1.55633	2.29091	0.823611	40	66	29	63	22	15	-8.82802	-8.32912	-8.99758	-8.30922	-9.6219	-9.79183
MOCS1	MOCS1	chr6	-	39872045	39902254	3777	26.135	10.6965	1.41003	0	0	1.28754	0.431782	29	39	15	26	10	9	-9.19825	-8.95491	-9.72878	-9.34407	-10.4239	-10.31
PHOSPHO1	PHOSPHO1	chr17	-	47300731	47308128	2173	210.031	172.86	1.29581	0	0	86.2732	34.7206	961	1250	866	1125	551	328	-4.65328	-4.4007	-4.5525	-4.4607	-5.57848	-5.98386
INPP1	INPP1	chr2	+	191208195	191236390	2342	70.7649	45.6358	1.292	0	1.73234	9.14395	3.59167	140	142	88	110	56	42	-7.27522	-7.36524	-7.64663	-7.61265	-8.55653	-8.63319
BOK	BOK	chr2	+	242498191	242513551	1103	55.5363	32.7329	1.33394	0	1.65339	19.4558	7.70402	128	125	126	102	65	34	-7.39132	-7.52948	-7.1836	-7.70879	-8.37665	-8.88223
AXL	AXL	chr19	+	41725107	41767670	4893	44.4147	23.7117	1.25638	0	1.31467	2.53483	1.01744	85	83	48	62	35	23	-7.91265	-8.04683	-8.40103	-8.32874	-9.10663	-9.32811
ARSD	ARSD	chrX	-	2822011	2847392	6887	39.132	19.719	1.34072	0	1.57123	1.41871	0.523452	56	70	30	63	24	18	-8.42716	-8.25718	-8.95841	-8.30922	-9.52762	-9.59724
PLAC2	PLAC2	chr19	-	5558179	5568005	3691	32.9253	15.2651	1.30343	0	0	2.28453	0.906939	47	59	35	48	29	10	-8.63754	-8.46517	-8.7785	-8.63723	-9.31888	-10.2065
NPAS1	NPAS1	chr19	+	47523100	47549016	2229	28.4043	12.2164	1.32616	0	1.63833	6.68522	2.69554	92	97	87	58	52	18	-7.81309	-7.85178	-7.66119	-8.40984	-8.64503	-9.59724
SAMD11	SAMD11	chr1	+	860529	879961	2216	27.0555	11.2312	1.3027	0	1.6775	23.153	9.37353	320	293	332	205	145	97	-6.17562	-6.40793	-5.88581	-6.80157	-7.36894	-7.5984
KCNE3	KCNE3	chr11	-	74165887	74178600	3118	259.142	220.211	1.23657	0	0	118.434	49.2208	2072	2310	1796	2099	1015	773	-3.56547	-3.52971	-3.51881	-3.57664	-4.72736	-4.79591
TMEM90B	TMEM90B	chr20	+	24449834	24647167	2437	108.493	78.856	1.24475	0	0	20.7971	8.66437	297	302	281	256	145	101	-6.27672	-6.36715	-6.11345	-6.50498	-7.36894	-7.5467
ZNF193	ZNF193	chr6	+	28193066	28201260	1793	63.7047	39.7566	1.1931	0	1.45317	12.5658	5.36161	136	126	97	146	68	44	-7.31284	-7.51926	-7.52212	-7.24769	-8.3217	-8.57765
DNAJC22	DNAJC22	chr12	+	49741040	49745683	2287	59.0033	35.7541	1.2373	0	1.58688	7.74469	3.11508	89	127	92	89	40	43	-7.85487	-7.50911	-7.5899	-7.88102	-8.95311	-8.60513
CSF1	CSF1	chr1	+	110453232	110472354	3653	55.4419	32.6911	1.20034	0	1.44521	5.12955	2.1852	104	131	78	107	61	32	-7.65766	-7.46926	-7.79966	-7.64792	-8.45361	-8.95267
ABCD1	ABCD1	chrX	+	152990322	153010216	3883	51.7855	29.7562	1.21122	0	1.84303	14.684	6.23361	338	417	214	309	185	97	-6.10124	-5.92877	-6.48174	-6.25125	-7.05142	-7.5984
ANGPTL4	ANGPTL4	chr19	+	8429010	8439257	1903	48.3468	26.9743	1.19985	0	1.47033	8.32279	3.56325	82	103	75	95	52	27	-7.95766	-7.77605	-7.84912	-7.79882	-8.64503	-9.14761
RIMBP3B	RIMBP3B	chr22	+	21737662	21743446	5784	41.3912	21.4087	1.15461	0	0	2.41432	1.06847	75	79	78	81	45	27	-8.06887	-8.10813	-7.79966	-7.99896	-8.81584	-9.14761
SERPINB7	SERPINB7	chr18	+	61420276	61472603	2358	40.2999	20.5855	1.24561	0	1.43026	5.75188	2.32967	86	85	44	89	40	24	-7.89797	-8.01719	-8.50616	-7.88102	-8.95311	-9.28054
MCOLN3	MCOLN3	chr1	-	85483765	85514169	5845	34.0361	16.0039	1.22182	0	1.74475	1.60293	0.660824	68	53	47	42	26	19	-8.19004	-8.59398	-8.42654	-8.79518	-9.43994	-9.53861
IGDCC4	IGDCC4	chr15	-	65673824	65715410	6751	33.8677	15.8574	1.22472	0	1.46226	1.26225	0.495854	38	64	34	55	18	21	-8.88795	-8.3666	-8.81255	-8.47406	-9.83512	-9.42897
PTPRZ1	PTPRZ1	chr7	+	121513158	121702088	8157	33.0844	15.3753	1.15699	0	1.31308	1.20329	0.515612	54	61	49	56	27	22	-8.47112	-8.42486	-8.37599	-8.45231	-9.39828	-9.37754
ETHE1	ETHE1	chr19	-	44010871	44031396	1128	31.0745	13.9514	1.17414	0	0	8.26641	3.5764	65	58	39	47	32	15	-8.24551	-8.48578	-8.65048	-8.66227	-9.20836	-9.79183
SLITRK6	SLITRK6	chr13	-	86366921	86373483	4181	26.6456	11.019	1.16655	0	0	1.78203	0.75959	55	42	34	36	22	15	-8.44896	-8.86875	-8.81255	-8.97482	-9.6219	-9.79183
MTHFS	MTHFS	chr15	-	80137319	80189370	483	26.3302	10.8232	1.16643	0	1.86072	14.225	5.86441	42	43	29	40	16	17	-8.77072	-8.84125	-8.99758	-8.85235	-9.95746	-9.65877
ATP6V1B1	ATP6V1B1	chr2	+	71162997	71192560	3970	25.7035	10.4178	1.21229	0	1.16723	1.60703	0.648617	36	29	32	46	15	15	-8.95076	-9.29232	-8.88345	-8.6878	-10.0236	-9.79183
DKK3	DKK3	chr11	-	11984544	12031316	4581	25.5291	10.327	1.23286	0	1.47622	3.16521	1.29284	65	100	50	110	43	26	-8.24551	-7.81339	-8.35142	-7.61265	-8.86903	-9.1904
LYN	LYN	chr8	+	56792385	56923936	3088	152.599	117.647	1.08736	0	1.66845	42.2743	19.5127	749	785	678	714	394	308	-5.0027	-5.05394	-4.8962	-5.09856	-6.0387	-6.06967
MAPK12	MAPK12	chr22	-	50688491	50700089	6202	92.5215	64.5594	1.06258	0	1.94054	9.53875	4.47021	304	423	263	336	196	127	-6.24518	-5.90922	-6.20338	-6.13759	-6.97545	-7.25093
DHRS7	DHRS7	chr14	-	60611501	60636561	1938	76.4415	50.182	1.12617	0	1.65672	17.7493	8.06075	210	206	179	176	114	68	-6.74192	-6.87838	-6.72063	-7.00314	-7.67749	-8.04631
LPAR4	LPAR4	chrX	+	78003205	78012576	2615	55.6648	32.8081	1.1152	0	0	7.71163	3.38083	115	129	75	133	54	49	-7.52917	-7.48904	-7.84912	-7.36866	-8.60004	-8.4482
KCTD15	KCTD15	chr19	+	34287750	34306665	5223	52.4831	30.3188	1.05644	0	1.37351	4.34788	2.05422	145	146	115	103	76	49	-7.22957	-7.32927	-7.30248	-7.6964	-8.18532	-8.4482
NR1H3	NR1H3	chr11	+	47269850	47290400	3158	48.762	27.2986	1.12339	0	1.23304	5.34022	2.33746	103	108	69	98	46	40	-7.66996	-7.71599	-7.95378	-7.75951	-8.79004	-8.69116
TLCD1	TLCD1	chr17	-	27051367	27053949	1189	44.9346	24.0651	1.0997	0	1.27641	13.3957	5.99175	76	106	84	91	43	40	-8.05241	-7.7397	-7.70581	-7.85307	-8.86903	-8.69116
CORO2A	CORO2A	chr9	-	100883257	100954956	7602	41.9055	21.7249	1.08585	0	1.34831	1.98953	0.903274	82	95	75	87	44	36	-7.95766	-7.87799	-7.84912	-7.90956	-8.84216	-8.81539
RASGRF1	RASGRF1	chr15	-	79252290	79383215	8691	37.8717	18.8748	1.14564	0	1.24519	1.40143	0.612322	55	94	58	66	38	24	-8.44896	-7.89129	-8.16952	-8.25229	-9.01235	-9.28054
SEMA6B	SEMA6B	chr19	-	4542599	4559771	3942	37.7258	18.7728	1.0542	0	0	3.68961	1.74193	92	75	84	75	46	34	-7.81309	-8.17235	-7.70581	-8.09466	-8.79004	-8.88223
TPCN1	TPCN1	chr12	+	113659259	113736387	1040	36.2281	17.6994	1.1323	0	2.01377	11.1108	4.86941	68	66	55	70	33	26	-8.19004	-8.32912	-8.23488	-8.17995	-9.17355	-9.1904
SPRY1	SPRY1	chr4	+	124317955	124324907	2615	35.0114	16.8173	1.14876	0	0	5.76666	2.52742	103	82	86	67	42	35	-7.66996	-8.0619	-7.6759	-8.23383	-8.89646	-8.84838
SPIN3	SPIN3	chrX	-	57002804	57021988	5708	33.3146	15.5236	1.09996	0	1.12113	1.98531	0.902246	77	63	53	61	37	23	-8.03615	-8.38574	-8.28029	-8.34856	-9.04302	-9.32811
PAK6	PAK6	chr15	+	40509628	40569687	4680	31.5794	14.3361	1.081	0	1.73062	2.37374	1.10043	55	68	59	67	38	22	-8.44896	-8.29267	-8.14842	-8.23383	-9.01235	-9.37754
FBLN5	FBLN5	chr14	-	92335755	92414046	1844	31.009	13.9514	1.05686	0	1.64003	26.2028	12.1024	227	364	175	317	148	112	-6.63814	-6.11418	-6.75071	-6.21661	-7.34244	-7.41378
CDH6	CDH6	chr5	+	31193795	31325237	7566	30.5758	13.6721	1.14614	0	2.15776	3.40243	1.46346	107	167	109	194	66	63	-7.62141	-7.15438	-7.37189	-6.87465	-8.35808	-8.14099
RNF165	RNF165	chr18	+	43906772	44040783	5933	28.9192	12.5528	1.10705	0	0	1.52652	0.679956	54	56	44	49	27	20	-8.47112	-8.52801	-8.50616	-8.61265	-9.39828	-9.48259
PRKCDBP	PRKCDBP	chr11	-	6340175	6341740	1037	28.0644	11.9549	1.06377	0	0	8.90577	4.05579	56	72	36	43	29	20	-8.42716	-8.2226	-8.74531	-8.7675	-9.31888	-9.48259
C13orf1	C13orf1	chr13	-	50486841	50510625	656	26.9934	11.2114	1.08396	0	1.30024	12.4459	5.49545	60	46	32	45	21	21	-8.34337	-8.76207	-8.88345	-8.71383	-9.67186	-9.42897
ZBTB7B	ZBTB7B	chr1	+	154975111	154990998	4165	91.371	63.7431	1.02318	0	1.07444	13.9897	6.80075	290	394	273	349	209	121	-6.30898	-6.00628	-6.15272	-6.08595	-6.89069	-7.31379
RAI14	RAI14	chr5	+	34656432	34832716	4451	90.4732	63.0033	1.01581	0	1.10642	11.7977	5.61168	283	364	230	300	154	137	-6.34199	-6.11418	-6.38469	-6.29125	-7.29091	-7.1521
KIAA0649	KIAA0649	chr9	+	138371647	138380739	4932	88.8193	61.5017	1.00687	0	1.03266	11.6422	5.70832	314	386	269	318	203	125	-6.20131	-6.03426	-6.17276	-6.21234	-6.92917	-7.27157
SNX33	SNX33	chr15	+	75941347	75950966	3231	64.6207	40.3877	1.04147	0	0	9.56921	4.54273	182	189	142	180	101	70	-6.93156	-6.99205	-7.02702	-6.97355	-7.83082	-8.01021
NUAK1	NUAK1	chr12	-	106457124	106533811	6821	50.0506	28.2374	1.04762	0	1.10767	3.69556	1.71139	135	177	92	161	76	60	-7.32241	-7.07824	-7.5899	-7.12006	-8.18532	-8.20116
BC040064	BC040064	chr21	+	46340965	46349588	2092	48.4768	27.0661	1.0014	0	1.10781	20.3028	9.72399	221	302	159	270	130	107	-6.6739	-6.36715	-6.87789	-6.43341	-7.50965	-7.47262
PCOLCE	PCOLCE	chr7	+	100199881	100205801	1851	33.8407	15.8574	1.04115	0	1.58966	53.6535	25.1334	457	727	377	665	306	236	-5.68831	-5.16101	-5.71133	-5.19765	-6.38146	-6.43026
SCHIP1	SCHIP1	chr3	+	158787116	159615139	5458	30.2665	13.4571	1.032	0	1.19182	1.8719	0.833489	52	80	41	56	20	33	-8.51657	-8.09255	-8.59085	-8.45231	-9.72391	-8.91697
MFAP2	MFAP2	chr1	-	17300999	17308081	1173	27.276	11.3875	1.04214	0	1.42751	21.6038	10.0981	116	194	92	166	82	56	-7.51806	-6.95764	-7.5899	-7.07999	-8.0914	-8.28582
PRR7	PRR7	chr5	+	176873795	176883283	1550	26.1074	10.6933	1.03128	0	1.33008	6.13095	2.93496	42	72	48	51	35	18	-8.77072	-8.2226	-8.40103	-8.56483	-9.10663	-9.59724
FADS3	FADS3	chr11	-	61640998	61659422	1897	26.0608	10.6707	1.0217	0	1.48691	43.2273	20.4517	422	640	270	506	260	192	-5.79785	-5.33828	-6.16773	-5.57655	-6.60026	-6.70661
NOS1	NOS1	chr12	-	117650978	117799582	6950	105.816	76.427	-1.0366	0	-1.95781	4.35236	8.74392	174	191	126	187	411	297	-6.99082	-6.97818	-7.1836	-6.92323	-5.98106	-6.11917
GSG1	GSG1	chr12	-	13237042	13256619	2355	45.8957	24.8884	-1.01369	0	-1.36517	3.88367	7.7633	65	51	48	41	115	98	-8.24551	-8.63986	-8.40103	-8.82345	-7.66638	-7.5853
TRIM9	TRIM9	chr14	-	51441981	51562422	7771	35.6264	17.226	-1.022	0	-1.83691	0.820992	1.65681	40	34	29	40	85	65	-8.82802	-9.11258	-8.99758	-8.85235	-8.04678	-8.10232
GLI1	GLI1	chr12	+	57853917	57866045	3643	63.4387	39.559	-1.12834	0	-1.4011	3.0127	6.43222	69	59	53	65	137	136	-8.17205	-8.46517	-8.28029	-8.271	-7.4422	-7.16167
DTX4	DTX4	chr11	+	58938902	58976060	5782	38.9192	19.5784	-1.13573	0	-1.10407	0.964521	2.09314	27	39	22	37	81	60	-9.27869	-8.95491	-9.31123	-8.94311	-8.10661	-8.20116
KCND1	KCND1	chrX	-	48818638	48828251	6000	33.2224	15.4639	-1.1039	0	-1.23951	1.24922	2.64654	26	52	27	63	112	73	-9.3209	-8.61672	-9.07967	-8.30922	-7.69999	-7.95781
TUB	TUB	chr11	+	8040790	8127653	6659	28.6781	12.4075	-1.12046	0	0	0.623094	1.31477	14	29	15	35	50	52	-9.98433	-9.29232	-9.72878	-9.00733	-8.69161	-8.37618
TGFBR3	TGFBR3	chr1	-	92145901	92371559	7451	66.9519	42.414	-1.17167	0	-1.27974	1.38317	3.07577	41	71	44	75	159	108	-8.79906	-8.23978	-8.50616	-8.09466	-7.24938	-7.46064
TMEM151B	TMEM151B	chr6	+	44238479	44275966	4923	49.31	27.6623	-1.16714	7.79572	-1.38362	1.35938	3.05117	39	37	35	39	99	76	-8.85764	-9.01569	-8.7785	-8.88191	-7.85601	-7.90736
FAM155B	FAM155B	chrX	+	68725077	68752349	4017	41.5776	21.4845	-1.16811	0	-1.43384	1.34389	3.01283	33	25	29	34	74	67	-9.05108	-9.45693	-8.99758	-9.04068	-8.21814	-8.06472
KCNJ4	KCNJ4	chr22	-	38822332	38851203	2120	29.2269	12.7754	-1.22805	0	0	1.34686	3.23901	12	19	14	19	50	30	-10.1406	-9.75313	-9.80174	-9.68628	-8.69161	-9.02716
PTPRE	PTPRE	chr10	+	129705324	129884162	7632	124.077	91.1665	-1.31339	0	-2.12312	2.12201	5.27463	99	98	93	73	276	193	-7.72029	-7.83887	-7.57607	-8.12813	-6.52025	-6.69968
ATP1A3	ATP1A3	chr19	-	42470735	42498382	4006	57.2472	34.2819	-1.29476	0	-2.07792	1.65941	3.96386	30	41	23	55	98	87	-9.15984	-8.89684	-9.26144	-8.47406	-7.86879	-7.73688
MMP3	MMP3	chr11	-	102706527	102714342	1828	46.0455	24.9883	-1.29234	0	-1.96244	2.53826	6.24501	30	26	22	26	76	57	-9.15984	-9.41373	-9.31123	-9.34407	-8.18532	-8.26415
BEGAIN	BEGAIN	chr14	-	101003485	101036131	2922	33.7772	15.8151	-1.32278	0	-1.6994	0.946654	2.43812	16	13	20	13	42	41	-9.846	-10.1441	-9.41707	-10.081	-8.89646	-8.66186
CDK6	CDK6	chr7	-	92234236	92465941	11760	27.9283	11.8526	-1.34683	0	-1.77817	3.64203	8.78773	116	413	96	335	692	512	-7.51806	-5.94195	-7.53542	-6.14164	-5.26277	-5.37074
LIPG	LIPG	chr18	+	47088426	47119276	4331	27.3108	11.4007	-1.25448	0	-1.56216	0.700488	1.66475	16	28	6	18	54	30	-9.846	-9.33151	-10.6368	-9.74384	-8.60004	-9.02716
CLIC2	CLIC2	chrX	-	154505501	154563986	2738	27.0582	11.2312	-1.40595	0	-1.39186	0.847324	2.19443	6	19	6	21	33	37	-10.795	-9.75313	-10.6368	-9.57861	-9.17355	-8.78322
BIRC3	BIRC3	chr11	+	102188193	102208464	5228	26.1027	10.6933	-1.3516	0	-1.78839	0.947255	2.47913	30	38	22	21	106	45	-9.15984	-8.98494	-9.31123	-9.57861	-7.7698	-8.55073
BCL11B	BCL11B	chr14	-	99635626	99737822	7813	333.28	291.338	-1.53933	0	0	10.6498	30.1456	386	564	345	570	1574	1170	-5.92005	-5.51343	-5.83317	-5.4118	-4.10845	-4.21191
LUM	LUM	chr12	-	91497232	91505542	2115	30.9747	13.9514	-1.52241	0	-1.66809	0.84378	2.47558	8	11	10	11	27	34	-10.5332	-10.3091	-10.1472	-10.2476	-9.39828	-8.88223
TMCC2	TMCC2	chr1	+	205197090	205242470	5499	71.229	46.0085	-1.69886	0	-2.19883	0.624722	2.10721	25	13	25	14	73	62	-9.36456	-10.1441	-9.16734	-10.0056	-8.23485	-8.16075
TMEM154	TMEM154	chr4	-	153547270	153601191	3085	52.7475	30.4907	-1.74041	0	-1.72685	3.09484	10.0162	25	79	22	88	216	144	-9.36456	-8.10813	-9.31123	-7.89522	-6.84709	-7.08687
BOC	BOC	chr3	+	112930411	113006303	8859	47.0908	25.9047	-1.85567	0	-1.8647	0.201444	0.736354	3	15	6	16	37	39	-11.3657	-9.99931	-10.6368	-9.86772	-9.04302	-8.72114
NOV	NOV	chr8	+	120428551	120436678	2601	86.4372	59.2669	-2.01616	0	-2.01508	1.44085	5.77504	6	33	11	34	102	73	-10.795	-9.14657	-10.0511	-9.04068	-7.81839	-7.95781
C2CD4C	C2CD4C	chr19	-	405443	409170	3123	34.6604	16.5028	-1.97504	0	0	0.271432	1.20931	3	5	3	8	27	17	-11.3657	-11.0241	-11.2292	-10.5526	-9.39828	-9.65877
KRT34	KRT34	chr17	-	39533922	39553844	1752	29.5373	12.9978	-2.34351	0	0	0.127326	1.12681	2	0	3	0	15	8	-11.6591	-13.5171	-11.2292	-13.5171	-10.0236	-10.4235
